# Supplementary material for: Associations between the Big Five personality traits, testosterone, and cortisol in adolescent male athletes
Source: PubMed Central journal article supplement (PMC10765448; doi:10.5114/biolsport.2024.127390), 2023-09-07
Supplement: JBS-41-50674-s1.pdf [file JBS-41-50674-s1.pdf]

## Supplemental Materials.

**TABLE S1.** Hierarchical regression models predicting the Big Five personality traits and trait anxiety.

| Predictors                       | Neuroticism |         | Extraversion |         | Openness |         | Agreeableness |         | Conscientiousness |         | Anxiety  |         |
|----------------------------------|-------------|---------|--------------|---------|----------|---------|---------------|---------|-------------------|---------|----------|---------|
|                                  | Est.        | Est.    | Est.         | Est.    | Est.     | Est.    | Est.          | Est.    | Est.              | Est.    | Est.     | Est.    |
| FT                               | -0.020*     | -0.001  | 0.015*       | -0.007  | 0.005    | -0.007  | -0.004        | 0.018   | 0.011             | 0.011   | -0.020** | -0.006  |
|                                  | (0.008)     | (0.018) | (0.006)      | (0.014) | (0.005)  | (0.011) | (0.005)       | (0.011) | (0.006)           | (0.014) | (0.008)  | (0.017) |
| FC                               | -0.023      | 0.072   | 0.008        | -0.101  | 0.014    | -0.050  | 0.006         | 0.114*  | 0.019             | 0.023   | -0.024   | 0.044   |
|                                  | (0.020)     | (0.083) | (0.015)      | (0.062) | (0.013)  | (0.052) | (0.013)       | (0.051) | (0.016)           | (0.066) | (0.019)  | (0.080) |
| FT ' FC                          |             | -0.000  |              | 0.000#  |          | 0.000   |               | -0.000* |                   | -0.000  |          | -0.000  |
|                                  |             | (0.000) |              | (0.000) |          | (0.000) |               | (0.000) |                   | (0.000) |          | (0.000) |
| R <sup>2</sup> adjusted          | 0.049*      | 0.052*  | 0.038*       | 0.056*  | 0.004    | 0.009   | -0.011        | 0.020   | 0.022             | 0.014   | 0.058*   | 0.056*  |
| $\Delta$ R <sup>2</sup> adjusted |             | 0.003   |              | 0.018   |          | 0.005   |               | 0.031*  |                   | -0.008  |          | -0.002  |

Note: Estimates are shown with standard errors (). FT = free testosterone, FC = free cortisol. Significance levels are depicted as #  $p \leq 0.10$  \*  $p \leq 0.05$  \*\*  $p \leq 0.01$

**TABLE S2.** Simple slope analyses for free testosterone (FT) and free cortisol (FC) concentrations in relation to extraversion and agreeableness.

| Extraversion                           |       |         |         | Agreeableness                          |       |         |         |
|----------------------------------------|-------|---------|---------|----------------------------------------|-------|---------|---------|
| Slope of FT when FC = 27.10 (-1 SD):   |       |         |         | Slope of FT when FC = 27.10 (-1 SD):   |       |         |         |
| Est.                                   | SE    | t value | p value | Est.                                   | SE    | t value | p value |
| 0.002                                  | 0.009 | 0.208   | 0.835   | 0.009                                  | 0.008 | 1.212   | 0.228   |
| Slope of FT when FC = 63.83 (Mean):    |       |         |         | Slope of FT when FC = 63.83 (Mean):    |       |         |         |
| Est.                                   | SE    | t value | p value | Est.                                   | SE    | t value | p value |
| 0.014                                  | 0.006 | 2.367   | 0.020   | -0.003                                 | 0.005 | -0.583  | 0.561   |
| Slope of FT when FC = 100.56 (+ 1 SD): |       |         |         | Slope of FT when FC = 100.56 (+ 1 SD): |       |         |         |
| Est.                                   | SE    | t value | p value | Est.                                   | SE    | t value | p value |
| 0.026                                  | 0.009 | 3.018   | 0.003   | -0.015                                 | 0.007 | -2.100  | 0.038   |

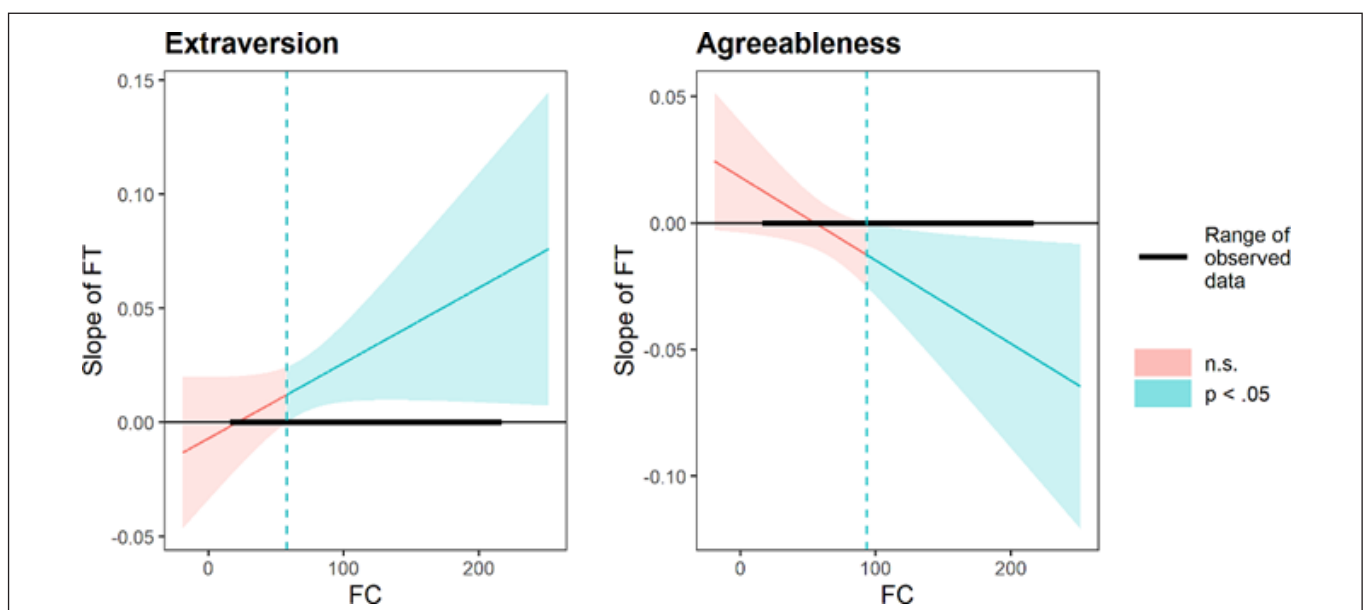**FIG. S1.** Interactions between free testosterone (FT) and free cortisol (FC) concentrations in relation to extraversion and agreeableness.
